1     **Transposon insertional mutagenesis in *Saccharomyces uvarum* reveals trans-acting**  
2                     **effects influencing species dependent essential genes**

3

4     **Running Title**

5     Gene essentially is influenced by trans effects

6

7     **Authors**

8     Monica R. Sanchez<sup>1,2</sup>, Celia Payen<sup>1</sup>, Frances Cheong<sup>1</sup>, Blake Hovde<sup>1</sup>, Sarah Bissonnette<sup>3</sup>,

9     Adam Arkin<sup>5</sup>, Jeffrey M. Skerker<sup>5</sup>, Rachel Brem<sup>6</sup>, Amy A. Caudy<sup>4</sup> and Maitreya J. Dunham<sup>1</sup>

10

11    **Affiliations**

12    <sup>1</sup>Department of Genome Sciences, University of Washington, Seattle, Washington, United

13    States of America

14    <sup>2</sup>Molecular and Cellular Biology Program, University of Washington, Seattle, Washington,

15    United States of America

16    <sup>3</sup>Department of Biological Sciences, California State University, Turlock, California, United

17    States of America

18    <sup>4</sup>Donnelly Centre for Cellular and Biomolecular Research, University of Toronto, Toronto,

19    ON, Canada

20    <sup>5</sup>Energy Biosciences Institute, University of California Berkeley, Berkeley, California United

21    States of America

22    <sup>6</sup>Molecular and Cellular Biology, University of California Berkeley, Berkeley, California,

23    United States of America

- 1 \* Corresponding author
- 2 Email : maitreya@uw.edu (MD)
- 3

## 1 **Abstract**

2           To understand how complex genetic networks perform and regulate diverse cellular  
3 processes, the function of each individual component must be defined. Comprehensive  
4 phenotypic studies of mutant alleles have been successful in model organisms in  
5 determining what processes depend on the normal function of a gene. These results are  
6 often translated to the increasing number of newly sequenced genomes by using sequence  
7 homology. However, sequence similarity does not always mean identical function or  
8 phenotype, suggesting that new methods are required to functionally annotate newly  
9 sequenced species. We have implemented comparative functional analysis by high-  
10 throughput experimental testing of gene dispensability in *Saccharomyces uvarum*, a sister  
11 species of *S. cerevisiae*. We created haploid and heterozygous diploid Tn7 insertional  
12 mutagenesis libraries in *S. uvarum* to identify species dependent essential genes, with the  
13 goal of detecting genes with divergent function. Comprehensive gene dispensability  
14 comparisons with *S. cerevisiae* revealed that approximately 12% of conserved orthologs are  
15 predicted to display diverged dispensability, including 22 confirmed differentially essential  
16 genes. Surprisingly, despite their differences in essentiality, these genes are capable of  
17 cross-species complementation, demonstrating that other *trans*-acting factors that are  
18 background dependent contribute to differential gene essentiality. Furthermore, we  
19 identified an instance of swapped essentiality between two paralogs, *CDC25* and *SDC25*  
20 between these two species. This data set provides direct experimental evidence of gene  
21 function across species, which can inform comparative genomic analyses, improve gene  
22 annotation and be applied across a diverse set of microorganisms to further our  
23 understanding of gene function evolution.

1 **Keywords**

2 Functional genomics, gene function evolution, yeast, insertional mutagenesis, essential

3 genes, orthologs

## 1 **Introduction**

2           The ability to accurately predict gene function based on DNA sequence similarity is  
3 a valuable tool, especially in the current stage of genomic research where numerous  
4 genomes are increasingly becoming sequenced. It has become crucially important to  
5 predict gene function based on sequence similarity due to the lack of experimentally  
6 determined functional information associated with each newly sequenced genome. Most  
7 functional predictive methods rely on similarities of DNA sequence homology, co-  
8 expression patterns as well as protein structure to help assign function to uncharacterized  
9 genes, using genes where known functions have been previously characterized (Eisen 1998;  
10 Usadel et al. 2009). However, these methods come with their own set of limitations and  
11 often produce a substantial number of predictive errors, highlighting the importance of  
12 implementing experimental methods to directly test gene function of previously  
13 uncharacterized genomes to improve current methods of gene function annotation.

14           The gold standard of gene function characterization relies on targeted deletions of  
15 predictive coding sequences to probe the contributions of each gene to specific biological  
16 processes. To get a global view of gene function within an organism, several genome-wide  
17 deletion collections have been created in model species, particularly in bacteria and yeast,  
18 (Baba et al. 2006; Berardinis et al. 2008; Porwollik et al. 2014; Winzeler et al. 1999)  
19 including highly diverged species (Kim et al. 2010; Schwarzmüller et al. 2014) as well as  
20 different strains within a species (Dowell et al. 2010). These systematic deletion collections  
21 are powerful tools for investigating molecular mechanisms of gene function, biological  
22 pathways, and genetic interactions, especially in the genetic workhorse *S. cerevisiae*, where  
23 gene function characterization and gene dispensability comparisons have been extensively  
24 performed amongst various deletion collections of yeast (Costanzo 2016; Dowell et al.  
25 2010; Kim et al. 2010; Tong et al. 2001). These studies have identified approximately 17%

1 of essential genes to be differentially essential between highly diverged species (*S.*  
2 *cerevisiae* and *S. pombe*) and have discovered 6% of essential genes (57) that are  
3 differentially essential even between two strains of *S. cerevisiae*.

4       However, considerable effort and resources are required to create these targeted,  
5 systematic libraries and they are not a practical approach for validating gene function  
6 across a wide range of non-standard genetic backgrounds in a high-throughput manner.  
7 Alternative approaches to targeted gene deletion libraries are transposon based  
8 mutagenesis methods used to create random insertional mutant collections, eliminating  
9 requirements for *a priori* knowledge about defined coding regions and providing  
10 information about partial loss of function or gain of function mutations. Random insertional  
11 profiling has been widely applied across various species and has been instrumental in  
12 understanding virulence genes, stress tolerance mechanisms and even tumor suppressor  
13 genes in mice (DeNicola et al. 2015; van Opijnen and Camilli 2013; de la Rosa et al. 2017;  
14 Weerdenburg et al. 2015; Yung et al. 2015; Coradetti et al. 2017). Several transposon  
15 libraries have also been implemented across diverged yeast species, providing useful  
16 information about gene function, growth inhibiting compounds and essential functional  
17 protein domains (Gangadharan et al. 2010; Guo et al. 2013b; Michel et al. 2017; Oh et al.  
18 2010; Ross-Macdonald et al. 1999; Zhao et al. 2017; Price et al. 2016) .

19       Here we utilize a random insertional method that has allowed us to assay gene  
20 dispensability of approximately 50,000 mutants in *Saccharomyces uvarum*, a species that  
21 diverged from *S. cerevisiae* approximately 20 million years ago and contains approximately  
22 80% identity in coding sequences to *S. cerevisiae* (Dujon 2010; Kellis et al. 2003; Scannell et  
23 al. 2007). These species can inter-mate to create hybrids, allowing us to leverage the large  
24 genetic toolsets established in *S. cerevisiae* to more fully explore the genetic basis for  
25 possible differential gene dispensability among these species. Genes with different

1 dispensability patterns between these two species can be used as a preliminary indicator of  
2 divergent gene function, providing a model for investigating gene function evolution  
3 between two diverged species of yeast. While this Tn7 insertional density is modest in  
4 comparison to other insertional mutant libraries (50,000 compared to > 300,000  
5 insertions) we successfully validated a subset of predicted differentially essential genes,  
6 proving this approach to be useful for prioritizing genes for testing viability (Michel et al.  
7 2017; Guo et al. 2013a). Furthermore, this Tn7 transposon mutagenesis library provides a  
8 valuable resource for studying *S. uvarum* gene function and serves as a framework for  
9 comparative functional genomics studies across newly sequenced, previously  
10 uncharacterized species.

11

## 12 **Results**

13

### 14 **Generating Tn7 insertional libraries in *S. uvarum* to predict essential and** 15 **nonessential genes**

16 One initial step to identifying genes with divergent gene function is to identify  
17 mutant phenotypes that are different between two diverged species. One of the most  
18 straightforward phenotypes to characterize is cell viability or gene dispensability.  
19 Therefore, we first sought to characterize gene essentiality in *S. uvarum*, with the aim of  
20 identifying genes that are differentially essential between *S. cerevisiae* and *S. uvarum*.  
21 Instead of creating a library of individual knock out strains, we applied a high-throughput  
22 approach of creating random insertional mutants and leveraged the power of sequencing to  
23 identify the insertion sites in a pooled collection. The Tn7 mutagenesis library approach  
24 described by Kumar *et al.*, (2004) was used to create a collection of *S. uvarum* mutant  
25 strains and has been previously described by Caudy *et al.*, (2013). Briefly, *in vitro*

1 transposition of the Tn7 transposon was performed in a plasmid library containing random  
2 *S. uvarum* genomic fragments. The Tn7 transposon was designed to carry a ClonNat  
3 resistance marker that carries stop codons in all reading frames near both termini. The  
4 interrupted genomic fragments were excised out of the plasmid and integrated at their  
5 corresponding genomic positions, likely producing truncations when inserted within coding  
6 regions (**Supplemental Fig. 1A**). The plasmid library contains ~50,000 unique genomic  
7 insertion sites that were integrated into a diploid and a haploid *MATa* strain at a 10X  
8 coverage (additional details can be found in **Supplemental Information**). Pools of mutants  
9 from each Tn7 library were grown up in liquid cultures as described in Materials and  
10 Methods. Insertion sites were determined using sequencing methods as described in detail  
11 in the **Supplemental Information** along with DNA sequencing library preparation  
12 protocols (**Supplemental Fig. 1C**).

13         The distribution of haploid, diploid and overlapping (present in both libraries)  
14 insertion sites are evenly distributed throughout the *S. uvarum* genome, as illustrated in  
15 **Supplemental Fig. 2**. (Detailed information about overall sequencing coverage is listed in  
16 **Supplementary File 4**.) Once the insertion sites were determined in both libraries, we  
17 counted the number of insertion sites in each annotated open reading frame using a custom  
18 Python script (Materials and Methods). **Supplemental Table 1** summarizes the number of  
19 insertion sites and the number of genes that contain insertion sites within each library,  
20 including the initial plasmid library. All annotated *S. uvarum* genes containing the number  
21 of insertion sites from each library are listed in **Supplementary File 5**. Of the 5,908  
22 annotated genes, a total of 5,315 (90%) genes harbor insertion sites that were identified in  
23 at least one library. Comparisons between shared genes and unique genes harboring  
24 insertion sites are illustrated in **Supplemental Fig. 3**.



1            Since the essentiality of most genes is expected to be conserved between *S.*  
2     *cerevisiae* and *S. uvarum*, we used the known essential set in *S. cerevisiae* to test if essential  
3     genes in the haploid library contain fewer insertion sites. We identified a significant  
4     reduction in the number of inserts present in known *S. cerevisiae* essential genes in the  
5     haploid library (Wilcoxon test  $p < 2.2 \times 10^{-16}$ , essential average inserts/kb=0.88, SD=1.28 vs.  
6     non-essential average inserts/kb = 4, SD = 4.38) (**Supplemental Fig. 4**), indicating that  
7     essential genes are effectively targeted by this approach. However, due to the nature of the  
8     library, insertional events at different positions across a gene may result in a partial loss of  
9     function. Since essential genes may still tolerate some insertions, we instead relied on  
10    comparisons between the diploid and haploid libraries to make inferences about gene  
11    essentiality. Specifically, we calculated an insertion ratio using the number of inserts per  
12    gene in the haploid library divided by the number of inserts in the diploid library, which  
13    inherently normalizes for the length of the gene (Materials and Methods). Using the  
14    insertion ratio as a metric, we also identified a significant difference between *S. uvarum*  
15    genes whose orthologs are known to be essential (Wilcoxon rank tests Sc\_E:Sc\_NE  $p <$   
16     $2.2 \times 10^{-16}$ ) (**Supplemental Fig. 5B**). Using the insertion ratio, we categorized genes as  
17    essential or non-essential using a null distribution to rank genes above or below a cut-off  
18    metric of 0.25 (details described in **Supplemental Information**). Using this cut-off  
19    value, 1170 genes were categorized as essential genes. We applied an additional cut-off  
20    metric (more details in Material and Methods) to remove a class of low coverage genes,  
21    resulting in a total number of 718 (13%) predicted essential genes and 3,838 (65%) genes  
22    that are predicted non-essential, with 1299 genes (22%) undetermined (genes without  
23    inserts in the diploid library). We proceeded to characterize each gene set and validate  
24    the dispensability of each of the predicted gene categories.

1

## 2 **Analysis of predicted gene dispensability**

3       The predicted gene list of *S. uvarum* essential genes was compared to known  
4 essential genes lists from both *S. cerevisiae* and *S. pombe* to determine the amount of  
5 conservation that exists between orthologs across diverged species. Of the predicted 718 *S.*  
6 *uvarum* essential genes, 297 genes (42%) are shared amongst all three sets, with a total of  
7 487 genes (68%) shared with at least one other set. Furthermore, 9 genes that are *S.*  
8 *cerevisiae* strain specific, including 4 genes that are S288C specific and 5 genes that are  
9  $\Sigma$ 1278b specific, overlap with *S. uvarum* predicted essential genes (**Supplemental Fig. 6**).  
10 Similar to what has been previously shown in *S. cerevisiae*, predicted essential genes in *S.*  
11 *uvarum* were more likely to be unique, with 91% of essential genes (656/718) being  
12 present in single copy compared to 76% of non-essential genes (2736/3604). Additionally,  
13 comparisons between Gene Ontology (GO) molecular function terms of essential gene sets  
14 from both species show significant enrichment (p-value < 0.01) for fundamental biological  
15 functions. Processes such as DNA replication/binding, RNA and protein biosynthesis, as  
16 well as structural constituents of the ribosome and cytoskeleton were enriched in both sets  
17 of essential genes (**Supplemental File 6**). In contrast, non-essential genes were  
18 significantly (p-value < 0.01) enriched for regulatory functions (transcription factor  
19 activity) and conditional responsive processes, such as transmembrane transporter activity  
20 and cell signaling (kinase activity) (**Supplemental File 7**).

21       Once we determined that many of the features of the predicted essential genes  
22 were similar to confirmed essential genes in other species, we proceeded to create  
23 heterozygous deletions to validate 13 conserved essential genes. Sporulating each  
24 heterozygous deletion strain and performing tetrad analysis for cell viability confirmed  
25 essentiality for 12 (92%) of the 13 strains (**Supplemental Table 2**). One example of a

1 confirmed essential gene can be found in **Figure 1A**, which illustrates the genomic positions  
2 of all insertion sites across a genomic locus of chromosome V that contains essential and  
3 non-essential genes. The color of the gene outline matches the predicted dispensability,  
4 which is determined by their insertion ratio. For example, the gene *BRR2* has an insertion  
5 ratio of 0.130 and is predicted to be a conserved essential gene (**Figure 1C**). The tetrad  
6 analysis of a *BRR2* heterozygous deletion strain displays a 2 viable:2 inviable segregation  
7 pattern in both species, validating this gene as a conserved essential gene (**Figure 1B**).  
8 Images of all other confirmed essential genes are located in **Supplemental Fig. 7**. We also  
9 tested three conserved non-essential genes and all three (100%) were confirmed as non-  
10 essential (**Supplemental Fig. 8**) (**Supplemental Table 2**). Additionally, we obtained an  
11 independent set of haploid deletion strains (see Materials and Methods), which was used as  
12 a validated non-essential gene set. Out of the total 356 gene deletions that were included in  
13 our library, 346 of those genes were predicted to be non-essential (97%) while the  
14 remaining 3% were predicted to be essential indicating that a significant proportion of our  
15 predicted non-essential genes were correctly predicted.

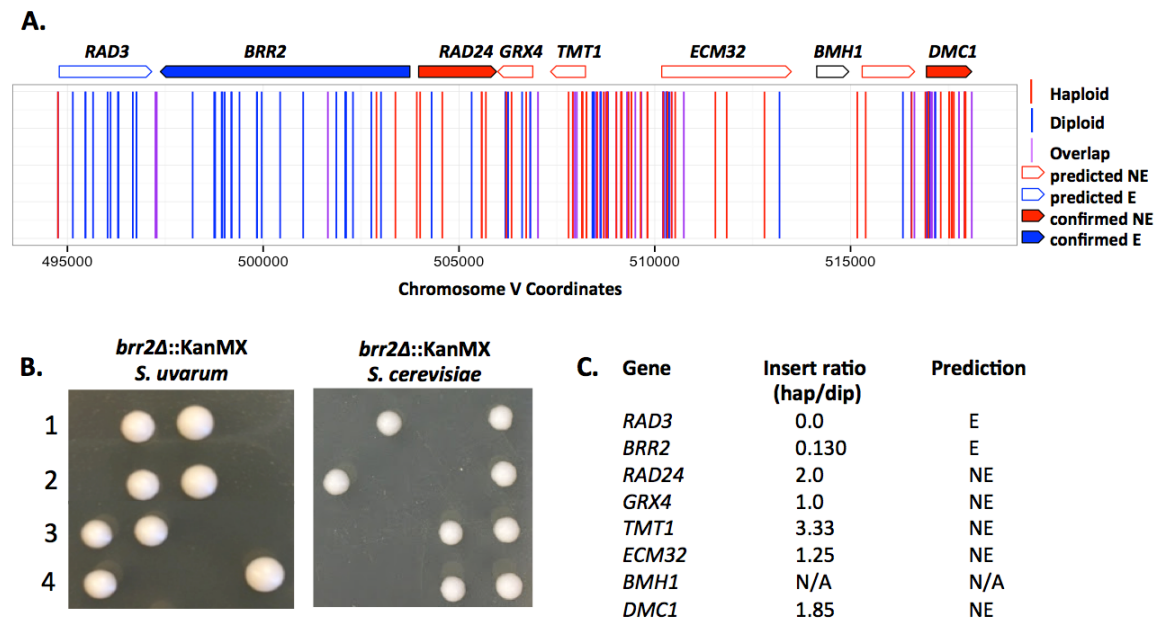

**Figure 1. Validation of conserved essential and non-essential genes.** A) Mapped chromosomal insertion positions are plotted across chromosome V. Haploid inserts are indicated in red, diploid inserts are blue and overlapping inserts are indicated in purple. Genes indicated across the top are outlined according to predicted dispensability and filled in if confirmed. B) Tetrad analysis of a confirmed conserved essential gene *brr2Δ* in *S. cerevisiae* and *S. uvarum*. Segregants containing *brr2Δ* alleles are inviable in both species. C) Table indicating the insertion ratio (number of haploid inserts by the number of diploid inserts) per gene. The final column lists the predicted classification (NE, non-essential; E, essential; N/A, no data).

### Gene dispensability comparisons of orthologous pairs between *S. cerevisiae* and *S. uvarum*

Our main goal of this project is to identify genes with differential essentiality to test for evidence of divergent function. While the previous section categorized all annotated *S. uvarum* genes, we narrowed our analysis to 4,543 orthologous genes for which we had data in the *S. uvarum* dataset to make direct comparisons of dispensability between *S. cerevisiae*

1 and *S. uvarum* (**Supplementary File 8**). Overall, 88% (4016/4543) of these genes display  
2 conserved dispensability between *S. cerevisiae* and *S. uvarum*. The remaining 12% of  
3 orthologs are predicted to differ in essentiality between the two species, with 304 (7%) of  
4 these genes only essential in *S. uvarum* and 221 (5%) genes only essential in *S. cerevisiae*  
5 (**Supplemental Figure 9**). Note the larger number of predicted essential genes in *S.*  
6 *uvarum* (304 in *S. uvarum* compared to 222 in *S. cerevisiae*). This difference may be  
7 attributed to the reliance on the absence of data (lack of insertion sites in a haploid gene) in  
8 a greater proportion of genes not previously characterized as an essential gene in *S.*  
9 *cerevisiae* (3687 non-essential genes vs. 765 essential genes), whereas, the latter category  
10 utilizes the presence of insertional data in a smaller proportion of genes that are known to  
11 be essential in *S. cerevisiae*. All predicted genes that differ in dispensability are listed in  
12 **Supplemental File 9**.

13 To analyze the two categories of genes that differ in essentiality further, we  
14 compiled a list of 222 genes from the *S. cerevisiae*-specific category and a more restrictive  
15 list (Materials and Methods) of 220 *S. uvarum*-specific genes to normalize the number of  
16 genes from each species. Using this list, we determined the proportion of *S. cerevisiae*-  
17 specific and *S. uvarum*-specific genes annotated for each function by performing Gene  
18 Ontology (GO) term finder using the molecular function ontology. The proportion of  
19 essential genes that differ between species for each functional category are represented in  
20 **Supplemental Figure 9B**, illustrating a subset of all significant functional categories.  
21 Interestingly, the most striking difference is in the functional category of the structural  
22 constituent of the ribosome. This category is enriched for genes that are predicted to be  
23 essential in *S. uvarum* (46/52). Additionally, differences exist between essential genes in  
24 the category of RNA polymerase activity, where 9/10 genes were identified from predicted

1 *S. cerevisiae* essential genes. Full lists of significant (p-value < 0.01) GO enrichment  
2 molecular function terms for each species individually are listed in **Supplemental File 10**.

3 To confirm a subset of these predicted essential genes within each genetic  
4 background, we applied the same method previously described to confirm conserved  
5 essential genes by sporulating heterozygous deletion strains to determine the viability  
6 pattern of the segregants. For example, gene *SSQ1* is an example of a confirmed *S. uvarum*-  
7 specific essential gene, illustrated in **Figure 2**. An example of one confirmed *S. cerevisiae*-  
8 specific gene is *VTC4*, illustrated in **Figure 3**. Overall, we confirmed a total of 22 predicted *S.*  
9 *uvarum*-specific and *S. cerevisiae*-specific essential genes (tetrad analysis can be found in  
10 **Supplemental Figs. 10 and 11** respectively). Interestingly, there are a variety of growth  
11 phenotypes associated with confirmed species-specific genes. All combined tetrad analysis  
12 results from the confirmation tests, also including false positives, are represented in  
13 **Supplemental Fig. 12. Supplemental Table 2** summarizes the total number of genes  
14 confirmed in each category. We note the higher false positive rate in the species-specific  
15 essential gene categories and attribute this to the low density of the overall library  
16 coverage.  
17

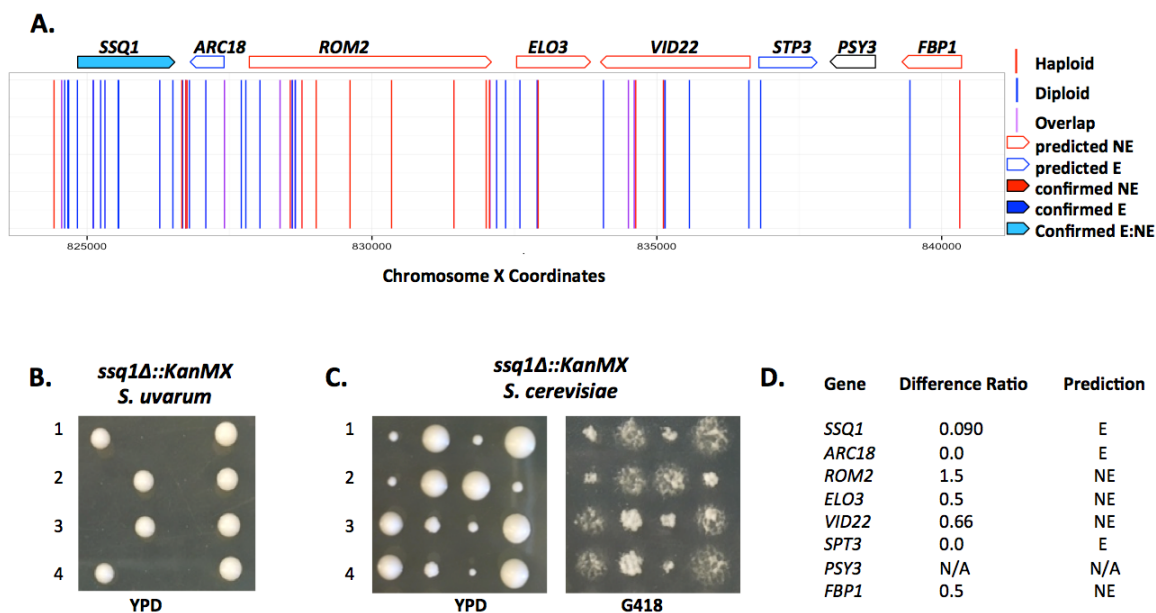

1  
2  
3  
4  
5  
6  
7  
8  
9  
10  
11  
12  
13

**Figure 2. Validation of *S. uvarum*-specific essential gene *SSQ1*.** A) Mapped chromosomal insertion positions are plotted across chromosome X. Haploid inserts are indicated in red, diploid inserts are blue and overlapping inserts are indicated in purple. Genes indicated across the top are outlined according to predicted dispensability and filled in, if confirmed. Light blue filling indicates a gene that is essential in *S. uvarum* and non-essential in *S. cerevisiae* (confirmed E\_NE). B) Tetrad analysis of a heterozygous *ssq1Δ::KanMX* strain displaying inviable segregants containing the *ssq1Δ* allele in *S. uvarum*. C) Tetrad analysis of a heterozygous *ssq1Δ::KanMX* strain in *S. cerevisiae* containing viable segregants plated on YPD and G418. D) Table indicating the insertion ratio (number of haploid inserts by the number of diploid inserts) per gene. The final column lists the predicted classification (NE, non-essential; E, essential; N/A, no data).

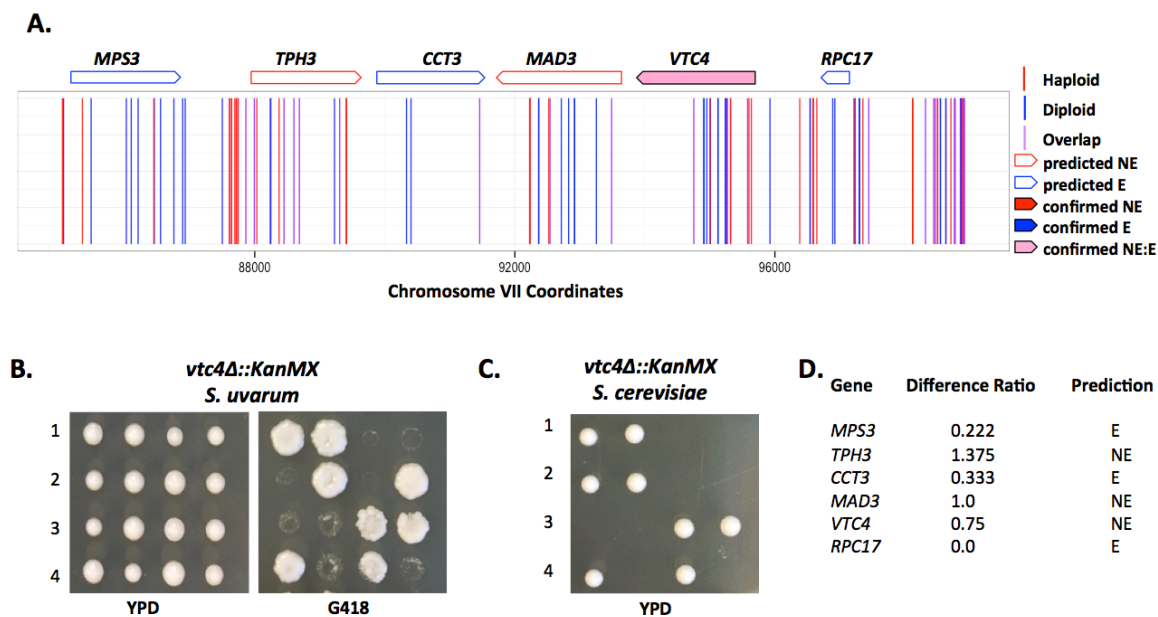

1  
2 **Figure 3. Validation of *S. cerevisiae*-specific essential gene *VTC4*.** A) Mapped  
3 chromosomal insertion positions are plotted across chromosome XII. Haploid inserts are  
4 indicated in red, diploid inserts are blue and overlapping inserts are indicated in purple.  
5 Genes indicated across the top are outlined according to predicted dispensability and filled  
6 in if confirmed. Light pink filling indicates a gene that is essential in *S. cerevisiae* and non-  
7 essential in *S. uvarum* (confirmed NE\_E). B) Tetrad analysis of a heterozygous *vtc4Δ* strain  
8 displaying viable segregants with the *vtc4Δ* allele in *S. uvarum* plated on YPD and G418. C)  
9 Tetrad analysis of a heterozygous *vtc4Δ* allele in *S. cerevisiae* resulting in inviable  
10 segregants. D) Table indicating the insertion ratio (number of haploid inserts by the  
11 number of diploid inserts) per gene. The final column lists the predicted classification (NE,  
12 non-essential; E, essential; N/A, no data).

13

14 In some cases, validation failures could be explained by errors in genome  
15 annotation, not errors in our insertional library results. One gene, *DRE2*, was predicted to  
16 be a non-essential gene but was confirmed as an essential gene through tetrad analysis.  
17 Although this gene was initially called as a false positive, closer analysis revealed that all the  
18 haploid insertions were clustered at the 5' end of the gene (**Supplemental Fig. 13**).  
19 Performing protein alignments of *DRE2* between *S. cerevisiae* and *S. uvarum* revealed an



1 annotated start codon in *S. uvarum* upstream of the annotated start codon in *S. cerevisiae*. It  
2 is likely that the gene was misannotated in *S. uvarum*, and instead shares the methionine  
3 start position further downstream. Using the reannotated gene coordinates, we would  
4 correctly classify *DRE2* as essential in *S. uvarum* since the haploid insertions were no longer  
5 included in the open reading frame. This one example highlights the utility of this library to  
6 improve gene annotation in addition to characterizing gene essentiality.

7 To determine if the differences in dispensability could be explained by gene  
8 expression, we compared a previously described metric used to quantify differences in gene  
9 expression between orthologous genes. We compared this metric in known genes that  
10 differ in essentiality and did not find evidence of genes enriched for expression differences,  
11 suggesting that gene expression alone cannot account for the differences in species  
12 dependent essentiality (**Supplemental Figure 14**).

13

#### 14 **Paralog divergence and duplicate gene loss explain some background effects on** 15 **differential gene dispensability**

16 Once we confirmed a list of genes that differed in dispensability between species  
17 and ruled out obvious expression differences, we set out to determine what genetic  
18 background effects could be contributing to the differences in dispensability between *S.*  
19 *cerevisiae* and *S. uvarum*. One explanation could be genetic redundancy due to gene  
20 duplications, such that a gene is nonessential in one species due to the presence of a  
21 paralog, whereas the other species contains only a single copy. To investigate this  
22 possibility, we began investigating genes that differed in dispensability and had paralogs.  
23 Of the 222 *S. cerevisiae*-specific essential genes, 11 were known to have paralogs. For  
24 example, *CDC25* is an *S. cerevisiae*-specific essential gene (nonessential in *S. uvarum*) and is  
25 a paralog to *SDC25*, which contains a premature stop codon in *S. cerevisiae*. We performed

1 complementation assays by cloning *S. uvarum* alleles of both paralogs into a CEN/ARS  
2 plasmid and testing whether the *S. uvarum* alleles could rescue the inviable phenotype of  
3 segregants from a heterozygous *cdc25Δ* deletion in *S. cerevisiae*. We found that *SDC25* from  
4 *S. uvarum* is functional and that both *SDC25* and *CDC25* alleles from *S. uvarum* can  
5 complement a *cdc25Δ* deletion in *S. cerevisiae* (**Table 1**). Although we did not test for  
6 complementation in the *S. uvarum* background, the results from the complementation  
7 assays suggest that perhaps *CDC25* is required for growth in *S. cerevisiae* due to the lack of  
8 redundancy as a consequence of the non-functional copy of *SDC25*.

9         Following this same logic, we hypothesized that *CDC25* non-essentiality in *S.*  
10 *uvarum* could be attributed to the redundancy provided by the functional copy of *SDC25* in  
11 this species. To test this idea, we created an *S. uvarum* mutant heterozygous for both  
12 *cdc25Δ sdc25Δ* and performed segregation analysis on the dissected tetrads (**Table 1**).  
13 Unexpectedly, the segregation pattern of a double mutant displays a lethal phenotype for  
14 not only the double mutant but also the single *sdc25Δ* mutant. We confirmed this result by  
15 constructing an *sdc25Δ* heterozygous mutant in *S. uvarum* and found a 2:2 segregation  
16 pattern showing that *SDC25* is an essential gene in *S. uvarum*. Although there is no clear  
17 explanation for the requirement of *SDC25* in *S. uvarum*, this comparison displays one clear  
18 example of paralog divergence in essentiality between these two species.

| Genotype                | <i>S. cerevisiae</i> | <i>S. uvarum</i> |
|-------------------------|----------------------|------------------|
| <i>cdc25Δ</i>           | -                    | +                |
| <i>sdc25Δ</i>           | +                    | -                |
| <i>cdc25Δ + ScCDC25</i> | +                    | N/D              |
| <i>cdc25Δ + SuCDC25</i> | +                    | N/D              |
| <i>cdc25Δ + SuSDC25</i> | +                    | N/D              |
| <i>cdc25Δ + ScSDC25</i> | -                    | N/D              |
| <i>sdc25Δ + ScCDC25</i> | N/D                  | -                |

1

2 **Table 1. Viability summary of gene deletions and complementation assays.** Signs in  
3 columns indicated by each species represent viability (-:inviabile, +:viable, N/D:not done).  
4 Complementation assays are represented by the gene deletion with the addition of each  
5 gene expressed on a low copy plasmid.

6

7

8 In addition to redundancy differences that are attributed to divergence between  
9 pairs of paralogs, gene gains and losses may also contribute to genetic background effects  
10 that result in differential dispensability between *S. cerevisiae* and *S. uvarum*. Previous  
11 studies have investigated gene gains and losses across the *Saccharomyces* clade and  
12 identified genes that lost their duplicate in some species but not others. For example, *ALR1*  
13 is found as a singleton in *S. cerevisiae* but has retained the duplicate copy in *S. uvarum*. The  
14 *ALR1* gene is a confirmed *S. cerevisiae*-specific essential gene, which may be explained by  
15 the loss of the other copy of the duplicate pair. We created a heterozygous deletion of both  
16 *ALR1* copies in *S. uvarum* and tested the viability phenotypes of each mutant and of the  
17 double mutant separately. Surprisingly, each single mutant and the double mutant were  
18 viable. Furthermore, *ALR2* (the paralog of *ALR1*) is also nonessential, and even the triple  
19 mutants had no phenotype (**Supplemental Fig. 15**).

20

## 1 **Divergent gene dispensability is largely due to trans effects**

2           While genetic redundancy or gene loss is a possible explanation for a fraction of  
3 differentially essential genes, the remaining much larger portion of this class of genes  
4 remained unexplained. Because our main goal for this study was to find evidence of gene  
5 function divergence between these two species, we proceeded to further investigate the  
6 remaining differentially essential genes for functional differences. For a subset of these  
7 genes, we performed complementation assays in both species to test for divergent function.  
8 We cloned five *S. cerevisiae* alleles from the list of *S. uvarum*-specific essential genes (*SAC3*,  
9 *TUP1*, *CCM1*, *SSQ1*, and *AFT1*) and seven *S. uvarum* alleles from the list of *S. cerevisiae*-  
10 specific essential genes (*ALR1*, *SHR3*, *CDC25*, *INN1*, *LCD1*, *SEC24*, *VTC24*) into a CEN/ARS  
11 plasmid to perform complementation tests in *S. uvarum* and *S. cerevisiae* (**Supplemental**  
12 **Fig. 16**). The results from these complementation tests revealed that all genes are able to  
13 complement the inviable phenotype in the other species, suggesting that the differences in  
14 essentiality are more likely to be due to *trans*-acting changes rather than functional  
15 differences of protein coding regions.

16

## 17 **Discussion**

18           In this study, we applied a comparative functional genomics approach to investigate  
19 how genetic background influences gene dispensability between two diverged species of  
20 yeast. Using insertional integration comparisons between haploid and diploid pools of  
21 mutants, we prioritized genes to validate as predicted essential, non-essential and  
22 differentially essential gene categories in *S. uvarum*. We predicted approximately 12% of  
23 orthologs to differ in dispensability between *S. uvarum* and *S. cerevisiae* and validated 22  
24 genes in this category. Surprisingly, however, most genes that differ in dispensability have  
25 retained their function between these two species, suggesting that differences in gene

1 dispensability are likely due to *trans*-acting changes rather than the direct result of  
2 divergent coding sequence.

3       Specifically, our comparison of orthologous genes between *S. cerevisiae* and *S.*  
4 *uvarum* revealed that a majority of genes maintain conserved dispensability requirements  
5 (88%) while 12% of orthologs are predicted to be essential in one species but not the other.  
6 We confirmed 93% (15/16) of predicted conserved categories of essentiality and 49%  
7 (27/55) of genes predicted to be differentially essential. Although our rate of confirmed  
8 genes in this category was lower than the conserved category, we correctly identified a  
9 subset of genes that are differentially dispensable, despite the moderately dense insertional  
10 profile of the library and a less restrictive cut-off value applied to include more genes to be  
11 classified as this type. Further analysis of predicted species-specific essential genes  
12 revealed enriched GO ontology terms of molecular functions involved in structural  
13 constituent of the ribosome and DNA binding, although more precise analysis of functional  
14 enrichments may require more thorough validation to remove the influence of false  
15 positives. Finally, we utilized genetic tools in *S. uvarum* to test hypotheses about genetic  
16 background effects that contribute to differences in essentiality. We find that differences  
17 can be explained by paralog divergence and *trans*-acting factors.

18       Applying a random insertional approach has proved to be useful in functionally  
19 profiling *S. uvarum* and will be useful for studying other understudied species, with the goal  
20 of adding information to gene annotation methods. While this study was performed in  
21 standard laboratory conditions, it is easily amenable for testing stressful conditions, other  
22 nutrient sources as well as naturally relevant conditions. This library can be applied to  
23 probe previously un-annotated genes or even proto-genes for functional acquisition, since it  
24 is not restricted to *a priori* assumptions of genic boundaries. The identification of synthetic  
25 lethal interactions can also be determined by performing insertional profiling in the

1 background of a particular mutation of interest relatively quickly and economically.  
2 Additionally, pooled competition experiments *en masse* can be used to determine the  
3 frequency of particular insertional mutants, providing quantitative measurements of  
4 cellular fitness across conditions. Such a strategy could be efficiently employed using  
5 computational approaches to prioritize experimental conditions that are most likely to  
6 probe the most valuable phenotypic information for further functional characterization  
7 (Guan et al. 2010).

8 Gene regulation also plays a large role in evolution and is crucial for responding to  
9 environmental change (Carroll 2005). In previous studies, we aimed to functionally  
10 characterize differences in gene expression patterns between *S. cerevisiae* and *S. uvarum*  
11 and discovered species-specific responses to osmotic stress, peroxisome biogenesis and  
12 autophagy, suggesting that each species may been exposed to different selective pressures  
13 within their respective evolution histories (Caudy et al. 2013; Guan et al. 2013).  
14 Interestingly, we did not find that genes with different gene expression patterns between  
15 species were more likely to be differentially essential. Instead, *trans* genetic interactions  
16 dominate. Identifying the molecular basis of these *trans* effects can now be undertaken,  
17 potentially revealing principles of genetic interactions across species.

18

## 1 **Materials and Methods**

2

### 3 **Strains, plasmids and primers**

4       The strains, plasmids and primers used in this study are listed in **Supplementary**  
5 **Files 1, 2 and 3** respectively. All *S. uvarum* strains are derivatives of the sequenced strain  
6 CBS 7001 (previously sometimes called *S. bayanus* or *S. bayanus* var *uvarum*), and all *S.*  
7 *cerevisiae* strains are of S288C background. Unless specified below, yeast strains were  
8 grown at 25°C for *S. uvarum* strains and 30°C for *S. cerevisiae* strains and standard media  
9 recipes were used.

10

### 11 **Construction of the Tn7 mutagenesis library**

12       The construction of the Tn7 plasmid library has been previously described in detail  
13 and was obtained from the Caudy lab (Caudy et al. 2013). Briefly, this mutagenesis  
14 approach uses a plasmid library of *S. uvarum* genomic DNA, containing random Tn7  
15 transposon insertions. The construct has a selectable marker for transformation into yeast,  
16 allowing the selection of disruption alleles.

17       To make the plasmid library, genomic DNA was isolated and fragmented by  
18 sonication to an average length of 3 kb from a *rho0 S. uvarum* strain. The ends of the DNA  
19 were blunted and cloned into the pZero Blunt vector (Invitrogen). Approximately 50,000  
20 colonies were recovered from the transformation into *E. coli* DH5 $\alpha$  strain. The  
21 transformants were scraped from Kanamycin plates and pooled for plasmid purification. A  
22 version of the Tn7 transposon was constructed by amplifying the promoter from the Tet-on  
23 pCM224 (Bellí et al. 1998). The cassette of the Tet-on promoter and the ClonNAT resistance  
24 gene was amplified using PCR primers containing lox and BamHI sites and cloned into the  
25 BamHI site of the NEB vector pGPS3. This transposon construct was inserted into the *S.*

1 *uvarum* genomic DNA library *in vitro* using the transposon kit from NEB. Initial selection  
2 (50,000 colonies) was on ClonNAT/Zeo. HindIII and XbaI were used to digest the pZero  
3 backbone to release the linearized genomic DNA for efficient recombination. The library  
4 was then used to transform a haploid *S. uvarum* strain (ACY12) and a diploid strain  
5 (YMD1228) using a modified transformation protocol optimized for *S. uvarum* (Caudy et al.  
6 2013). Transformant colonies were plated to YPD-ClonNat plates and allowed to grow for 5  
7 days at 25°C. A total of ~ 500,000 colonies were scraped for each pool. Each final pool was  
8 well mixed at a 1:1 ratio with 50% glycerol and 2 ml aliquots were stored at -80°C.

9

#### 10 **Pooled growth of Tn7 *S. uvarum* libraries**

11 To determine the initial complexity of the integrated pools, genomic DNA was  
12 extracted directly from the glycerol stocks of both haploid and diploid pools using the  
13 Hoffman and Winston method (Hoffman and Winston 1987). Additionally, we inoculated  
14 500 µl of both libraries in separate YPD flasks for 24 hours to recover mutants after 24  
15 hours of growth. Furthermore, to collect samples over time, we competed both pools under  
16 sulfate-limiting conditions in chemostats for approximately 30 generations at 25°C. A large-  
17 volume, ~300ml, sulfate-limited chemostat (Gresham et al. 2008) was inoculated with a  
18 single 2ml glycerol stock sample of each pool. After allowing the chemostat to grow at 25°C  
19 without dilution for ~24 hrs, fresh media was added to the chemostat at a rate of 0.17 h<sup>-1</sup>.  
20 This pooled growth assay was repeated twice, each including 5 time points with O.D. and  
21 dilution rate measurements as well as collected cell pellets for DNA extractions using the  
22 modified Hoffman-Winston prep referenced above.

23

#### 24 **Tn7 sequencing library preparation**



1            Sequencing libraries were prepared by first extracting genomic DNA from pools of  
2 each library grown in YPD and sulfate limited conditions. Genomic DNA libraries were  
3 prepared for Illumina sequencing using a Tn7-seq protocol described previously (Wetmore  
4 et al. 2015). Briefly, the Covaris was used to randomly fragment DNA to approximately 200-  
5 800 bp in length. The fragments were blunt ended and A-tails were added to the fragments  
6 to ligate the Illumina adapter sequences. Custom index primers (listed in **Supplementary**  
7 **File 3**) targeting Tn7-specific sequence and Illumina adapter sequence were used to enrich  
8 for genomic DNA with Tn7 insertion sites. The barcoded libraries were quantified on an  
9 Invitrogen Qubit Fluorometer and submitted for 150 bp-paired end sequencing on an  
10 Illumina HiSeq 2000 by JGI. This method was also applied to make the plasmid library, from  
11 linearized plasmid DNA.

12

### 13 **Sequencing analysis**

14            Sequencing reads from the FASTQ files were trimmed to remove Tn7 specific  
15 sequences and adapter sequences, restricting the minimal length of reads to 36 bp using  
16 Trimmomatic (Bolger et al. 2014) and FASTX-Toolkit. Trimmed FASTQ files were aligned  
17 against the reference strain of *S. uvarum* (CBS 7001) using Burrows-Wheeler Aligner (BWA)  
18 with standard filters applied (Li and Durbin 2009). Specifically, non-uniquely mapping  
19 reads, reads in which the pair did not map, reads with a mapping quality less than 30 and  
20 PCR/optical duplicate reads were filtered out; the samtools C-50 filter was applied as  
21 recommended for reads mapped with BWA. To limit the insertional analysis to actively  
22 growing cells, SAM files were merged from the later time points in the growth assays of  
23 each pool using samtools (Li et al. 2009). The sequence coverage of the nuclear genome  
24 ranged from 70 to 300x (**Supplementary File 4**). Insertion sites were determined from  
25 SAM files using a custom Ruby script. Insertion sites that had 10 reads or more were

1 processed through a custom Python script that counted the number of insertion events in  
2 each coding region across the genome. This pipeline was applied to both libraries and  
3 further comparisons were made between the pools to determine essential genes. Read data  
4 have been deposited at the NCBI under the SRA accession number SRP115313.

5

## 6 **Predicting gene dispensability between species**

7 In order to determine a list of predicted essential genes, comparisons were made  
8 between the haploid and diploid libraries. We calculated an insertion ratio by dividing the  
9 number of insertions in the haploid pool by the number in the diploid pool. This direct  
10 comparison inherently accounts for the length of the gene, since the length is constant in  
11 both libraries. Therefore, a decrease in insertion sites in the haploid library indicates a  
12 reduction in the presence of mutants containing insertional sites that impact cellular  
13 viability. Ratios closer to zero represent insertional mutants that reduce the frequency of  
14 haploids harboring insertional sites in a coding region that is required for cellular growth.

15 To make an insertion ratio cut-off value to categorize essential and non-essential  
16 genes, we analyzed the distribution of insertion ratios within intergenic regions between  
17 500 bp and 7 kb in length and positioned between Watson and Crick coding regions (so  
18 chosen because these are less likely to contain promoter sequences). The distribution of the  
19 insertion ratio calculated for these regions was similar to that of known non-essential genes  
20 in *S. cerevisiae*. Therefore, we used this distribution to rank the insertion ratios of all coding  
21 regions and set a cut-off value to 0.25 where 20% of the insertion ratio of coding regions fell  
22 below the intergenic distribution, which was similar to the kernel density estimates of  
23 known *S. cerevisiae* essential genes. The kernel density estimates were computed in R using  
24 X and visualized using ggplot2. To remove a class of low coverage genes in the essential  
25 gene category, we applied an additional cut-off value. Since the difference between 0 and 1

1 with a gene that is longer has a lower weighted difference than a shorter gene, we  
2 calculated the difference between the diploid pool and haploid pool and normalized this  
3 value to the length of the gene (normalized difference). Genes with less than a normalized  
4 difference of 2 were removed from the essential category.

5

## 6 **Validating predicted essential and non-essential genes**

7 We validated predicted essential genes by creating *S. uvarum* heterozygous diploid  
8 deletion mutants using primers listed in the **Supplemental File 3**. Primers containing 50  
9 bp of homology upstream and downstream of each candidate open reading frame were used  
10 to amplify the KanMX cassette from the pRS400 plasmid. The PCR product was used to  
11 integrate into the *S. uvarum* genome using an *S. uvarum* specific transformation protocol.  
12 The proper integration of the construct was validated through clone purifying positive  
13 colonies and extracting genomic DNA to perform PCR using diagnostic primers listed in the  
14 **Supplemental File 3**. The diagnostic primers were designed to target ~150 bp upstream  
15 and ~150 bp downstream of the open reading frame to identify wild type and drug marker  
16 alleles. Positive clones were sporulated for 3-5 days at 25°C and 8 tetrads were screened  
17 for 2:2 viable segregation. Images were taken after 4 days of growth on YPD plates.  
18 Mutants conferring non-essential phenotypes were replicated on G418 plates and images  
19 were taken after 4 days of growth at 25°C (**Supplemental Fig. 9&10**). This method was  
20 also applied to making double mutants. A collection of 440 *MAT $\alpha$*  *S. uvarum* strains was  
21 generated by standard methods in the Rine lab and used as confirmed non-essential genes.

22

## 23 **Cross-species complementation assays**

24 To determine if genes are diverging in gene function or in other trans-acting factors,  
25 we performed cross-species complementation assays with species-specific essential genes.

1 Essential genes that were *S. cerevisiae* specific were tested in a heterozygous diploid  
2 deletion strain from the magic marker collection. Alleles of each *S. cerevisiae* essential gene  
3 were amplified from *S. cerevisiae* and *S. uvarum* genomes and cloned into a CEN ARS  
4 plasmid. PCR using Phusion DNA polymerase was used to amplify 500 bp upstream and 5  
5 bp downstream of the stop codon of each gene from *S. cerevisiae* and *S. uvarum*. Each gene  
6 was cloned into pIL37 by Gibson assembly using primers listed in **Supplemental File 3**  
7 using standard methods (Thomas et al. 2015). All plasmids used in this study are listed in  
8 **Supplemental File 2**. The *S. cerevisiae* heterozygous diploid deletion strains were  
9 transformed with a plasmid containing a corresponding allele from each species and  
10 selected on C-URA plates. Similarly, *S. uvarum* specific essential genes were also tested by  
11 making each heterozygous diploid deletion strain *ura3Δ/ura3Δ*, and transformed with a  
12 plasmid containing a corresponding *S. cerevisiae* allele from the MoBY-ORF collection (Ho et  
13 al. 2009).

14 Transformed strains were sporulated for 5 days at 30°C and 25°C for *S. cerevisiae* and  
15 *S. uvarum* species, respectively and tetrad analysis was performed on YPD plates. After 3  
16 days of growth, plates were replica plated on C-URA and YPD+G418 plates and imaged after  
17 2 days of growth (**Supplemental Fig. 15**).

18

## 19 **Data Access**

20 The transposon insertion data in this study have been submitted to the NCBI Sequence Read  
21 Archive (SRA; <https://www.ncbi.nlm.nih.gov/sra/>) under SRA accession number  
22 SRP115313.

23

## 1 **Acknowledgments**

2           Thank you to Jasper Rine for generously sharing *S. uvarum* deletion strains. Thank  
3 you to Noah Hanson and Kolena Dang for technical assistance with tetrad dissections.  
4 Thank you to Daniel Chee for his help with optimizing the Python code and Jeremy Stone for  
5 his help with the Ruby script that was used for the insertional analysis pipeline. We thank  
6 M.K. Raghuraman and Harmit Malik for their helpful comments on the manuscript and  
7 thank Sergey Kryazhimskiy for his helpful insight about data analysis. This work was  
8 supported by NSF grant 1516330. MS was funded by NSF GSRF DGE-1256082 and the  
9 Robert D. Watkins Graduate Research Fellowship from the American Society for  
10 Microbiology. MJD is supported in part by a Faculty Scholars grant from the Howard  
11 Hughes Medical Institute. MJD is also a senior fellow in the Genetic Networks program at the  
12 Canadian Institute for Advanced Research. Sequencing resources were provided by JGI CSP  
13 Project 1460. AAC was supported by an Open Operating Grant from the Canadian Institutes  
14 for Health Research and by a Discovery Grant from the Natural Sciences and Engineering  
15 Research Council of Canada. AAC is the Canada Research Chair of Metabolomics for Enzyme  
16 Discovery.

## 17 18 **Competing financial interests**

19 The authors declare no competing financial interests.

20

## 1   **References**

- 2   Baba T, Ara T, Hasegawa M, Takai Y, Okumura Y, Baba M, Datsenko KA, Tomita M, Wanner  
3       BL, Mori H. 2006. Construction of *Escherichia coli* K-12 in-frame, single-gene  
4       knockout mutants: the Keio collection. *Mol Syst Biol* **2**: 2006.0008.
- 5   Bellí G, Garí E, Piedrafita L, Aldea M, Herrero E. 1998. An activator/repressor dual system  
6       allows tight tetracycline-regulated gene expression in budding yeast. *Nucleic Acids*  
7       *Res* **26**: 942–947.
- 8   Berardinis V de, Vallenet D, Castelli V, Besnard M, Pinet A, Cruaud C, Samair S, Lechaplais C,  
9       Gyapay G, Richez C, et al. 2008. A complete collection of single-gene deletion  
10      mutants of *Acinetobacter baylyi* ADP1. *Mol Syst Biol* **4**: 174.
- 11  Bolger AM, Lohse M, Usadel B. 2014. Trimmomatic: a flexible trimmer for Illumina sequence  
12      data. *Bioinformatics* **30**: 2114–2120.
- 13  Carroll SB. 2005. Evolution at Two Levels: On Genes and Form. *PLoS Biol* **3**: e245.
- 14  Caudy AA, Guan Y, Jia Y, Hansen C, DeSevo C, Hayes AP, Agee J, Alvarez-Dominguez JR,  
15      Arellano H, Barrett D, et al. 2013. A New System for Comparative Functional  
16      Genomics of *Saccharomyces* Yeasts. *Genetics* **195**: 275–287.
- 17  Coradetti S, Pinel D, Geiselman G, Ito M, Mondo S, Reilly M, Cheng Y-F, Bauer S, Grigoriev I,  
18      Gladden J, et al. 2017. Functional genomics of lipid metabolism in the oleaginous  
19      yeast *Rhodospiridium toruloides*. *bioRxiv* 190546.
- 20  Costanzo M. 2016. Systems biology: A yeast global genetic interaction map. *Nat Methods* **13**:  
21      904–904.
- 22  de la Rosa J, Weber J, Friedrich MJ, Li Y, Rad L, Ponstingl H, Liang Q, de Quirós SB, Noorani I,  
23      Metzakopian E, et al. 2017. A single-copy Sleeping Beauty transposon mutagenesis  
24      screen identifies new PTEN-cooperating tumor suppressor genes. *Nat Genet* **49**:  
25      730–741.
- 26  DeNicola GM, Karreth FA, Adams DJ, Wong CC. 2015. The utility of transposon mutagenesis  
27      for cancer studies in the era of genome editing. *Genome Biol* **16**.
- 28  Dowell RD, Ryan O, Jansen A, Cheung D, Agarwala S, Danford T, Bernstein DA, Rolfe PA,  
29      Heisler LE, Chin B, et al. 2010. Genotype to phenotype: a complex problem. *Science*  
30      **328**: 469.
- 31  Dujon B. 2010. Yeast evolutionary genomics. *Nat Rev Genet* **11**: 512–524.
- 32  Eisen JA. 1998. Phylogenomics: Improving Functional Predictions for Uncharacterized  
33      Genes by Evolutionary Analysis. *Genome Res* **8**: 163–167.
- 34  Gangadharan S, Mularoni L, Fain-Thornton J, Wheelan SJ, Craig NL. 2010. DNA transposon  
35      Hermes inserts into DNA in nucleosome-free regions in vivo. *Proc Natl Acad Sci* **107**:  
36      21966–21972.

- 1 Gresham D, Desai MM, Tucker CM, Jenq HT, Pai DA, Ward A, DeSevo CG, Botstein D, Dunham  
2 MJ. 2008. The Repertoire and Dynamics of Evolutionary Adaptations to Controlled  
3 Nutrient-Limited Environments in Yeast. *PLoS Genet* **4**: e1000303.
- 4 Guan Y, Dunham M, Caudy A, Troyanskaya O. 2010. Systematic Planning of Genome-Scale  
5 Experiments in Poorly Studied Species. *PLOS Comput Biol* **6**: e1000698.
- 6 Guan Y, Dunham MJ, Troyanskaya OG, Caudy AA. 2013. Comparative gene expression  
7 between two yeast species. *BMC Genomics* **14**: 1–13.
- 8 Guo Y, Park JM, Cui B, Humes E, Gangadharan S, Hung S, FitzGerald PC, Hoe K-L, Grewal SIS,  
9 Craig NL, et al. 2013a. Integration Profiling of Gene Function With Dense Maps of  
10 Transposon Integration. *Genetics* **195**: 599–609.
- 11 Guo Y, Sheng Q, Li J, Ye F, Samuels DC, Shyr Y. 2013b. Large Scale Comparison of Gene  
12 Expression Levels by Microarrays and RNAseq Using TCGA Data. *PLOS ONE* **8**:  
13 e71462.
- 14 Ho CH, Magtanong L, Barker SL, Gresham D, Nishimura S, Natarajan P, Koh JLY, Porter J,  
15 Gray CA, Andersen RJ, et al. 2009. A molecular barcoded yeast ORF library enables  
16 mode-of-action analysis of bioactive compounds. *Nat Biotechnol* **27**.
- 17 Hoffman CS, Winston F. 1987. A ten-minute DNA preparation from yeast efficiently releases  
18 autonomous plasmids for transformation of *Escherichia coli*. *Gene* **57**: 267–272.
- 19 Kellis M, Patterson N, Endrizzi M, Birren B, Lander ES. 2003. Sequencing and comparison of  
20 yeast species to identify genes and regulatory elements. *Nature* **423**: 241–254.
- 21 Kim D-U, Hayles J, Kim D, Wood V, Park H-O, Won M, Yoo H-S, Duhig T, Nam M, Palmer G, et  
22 al. 2010. Analysis of a genome-wide set of gene deletions in the fission yeast  
23 *Schizosaccharomyces pombe*. *Nat Biotechnol* **28**: 617–623.
- 24 Li H, Durbin R. 2009. Fast and accurate short read alignment with Burrows–Wheeler  
25 transform. *Bioinformatics* **25**: 1754–1760.
- 26 Li H, Handsaker B, Wysoker A, Fennell T, Ruan J, Homer N, Marth G, Abecasis G, Durbin R.  
27 2009. The Sequence Alignment/Map format and SAMtools. *Bioinformatics* **25**: 2078–  
28 2079.
- 29 Michel AH, Hatakeyama R, Kimmig P, Arter M, Peter M, Matos J, Virgilio CD, Kornmann B.  
30 2017. Functional mapping of yeast genomes by saturated transposition. *eLife* **6**:  
31 e23570.
- 32 Oh J, Fung E, Schlecht U, Davis RW, Giaever G, St. Onge RP, Deutschbauer A, Nislow C. 2010.  
33 Gene Annotation and Drug Target Discovery in *Candida albicans* with a Tagged  
34 Transposon Mutant Collection. *PLoS Pathog* **6**.
- 35 Porwollik S, Santiviago CA, Cheng P, Long F, Desai P, Fredlund J, Srikumar S, Silva CA, Chu W,  
36 Chen X, et al. 2014. Defined Single-Gene and Multi-Gene Deletion Mutant Collections  
37 in *Salmonella enterica* sv *Typhimurium*. *PLOS ONE* **9**: e99820.

- 1 Price MN, Wetmore KM, Waters RJ, Callaghan M, Ray J, Kuehl JV, Melnyk RA, Lamson JS, Suh  
2 Y, Esquivel Z, et al. 2016. Deep Annotation of Protein Function across Diverse  
3 Bacteria from Mutant Phenotypes. *bioRxiv* 72470.
- 4 Ross-Macdonald P, Coelho PSR, Roemer T, Agarwal S, Kumar A, Jansen R, Cheung K-H,  
5 Sheehan A, Symoniatis D, Umansky L, et al. 1999. Large-scale analysis of the yeast  
6 genome by transposon tagging and gene disruption. *Nature* **402**: 413–418.
- 7 Scannell DR, Butler G, Wolfe KH. 2007. Yeast genome evolution—the origin of the species.  
8 *Yeast* **24**: 929–942.
- 9 Schwarzmüller T, Ma B, Hiller E, Istel F, Tscherner M, Brunke S, Ames L, Firon A, Green B,  
10 Cabral V, et al. 2014. Systematic Phenotyping of a Large-Scale *Candida glabrata*  
11 Deletion Collection Reveals Novel Antifungal Tolerance Genes. *PLoS Pathog* **10**:  
12 e1004211.
- 13 Thomas S, Maynard ND, Gill J. 2015. DNA library construction using Gibson Assembly®. *Nat*  
14 *Methods* **12**.
- 15 Tong AH, Evangelista M, Parsons AB, Xu H, Bader GD, Pagé N, Robinson M, Raghbizadeh S,  
16 Hogue CW, Bussey H, et al. 2001. Systematic genetic analysis with ordered arrays of  
17 yeast deletion mutants. *Science* **294**: 2364–2368.
- 18 Usadel B, Obayashi T, Mutwil M, Giorgi FM, Bassel GW, Tanimoto M, Chow A, Steinhauser D,  
19 Persson S, Provarnt NJ. 2009. Co-expression tools for plant biology: opportunities for  
20 hypothesis generation and caveats. *Plant Cell Environ* **32**: 1633–1651.
- 21 van Opijnen T, Camilli A. 2013. Transposon insertion sequencing: a new tool for systems-  
22 level analysis of microorganisms. *Nat Rev Microbiol* **11**: 435–442.
- 23 Weerdenburg EM, Abdallah AM, Rangkuti F, Ghany MAE, Otto TD, Adroub SA, Molenaar D,  
24 Ummels R, Veen K ter, Stempvoort G van, et al. 2015. Genome-Wide Transposon  
25 Mutagenesis Indicates that *Mycobacterium marinum* Customizes Its Virulence  
26 Mechanisms for Survival and Replication in Different Hosts. *Infect Immun* **83**: 1778–  
27 1788.
- 28 Wetmore KM, Price MN, Waters RJ, Lamson JS, He J, Hoover CA, Blow MJ, Bristow J, Butland  
29 G, Arkin AP, et al. 2015. Rapid Quantification of Mutant Fitness in Diverse Bacteria  
30 by Sequencing Randomly Bar-Coded Transposons. *mBio* **6**: e00306-15.
- 31 Winzeler EA, Shoemaker DD, Astromoff A, Liang H, Anderson K, Andre B, Bangham R, Benito  
32 R, Boeke JD, Bussey H, et al. 1999. Functional characterization of the *S. cerevisiae*  
33 genome by gene deletion and parallel analysis. *Science* **285**: 901–906.
- 34 Yung MC, Park DM, Overton KW, Blow MJ, Hoover CA, Smit J, Murray SR, Ricci DP, Christen  
35 B, Bowman GR, et al. 2015. Transposon Mutagenesis Paired with Deep Sequencing  
36 of *Caulobacter crescentus* under Uranium Stress Reveals Genes Essential for  
37 Detoxification and Stress Tolerance. *J Bacteriol* **197**: 3160–3172.



- 1 Zhao L, Anderson MT, Wu W, T. Mobley HL, Bachman MA. 2017. TnseqDiff: identification of
- 2 conditionally essential genes in transposon sequencing studies. *BMC Bioinformatics*
- 3 **18**: 326.
- 4
